# Supplementary material for: A Quantitative Comparison of Cell-Type-Specific Microarray Gene Expression Profiling Methods in the Mouse Brain
Source: PLoS One. 2011 Jan 27;6(1):e16493. doi: 10.1371/journal.pone.0016493 (PMC3029380; doi:10.1371/journal.pone.0016493)
Supplement: Table S2 — Sample groups used for computing contamination indices and the values of the contamination indices. (A) Non GABAergic and GABAergic samples. (B) Non astrocyte and astrocyte samples. (C) Non oligodendrocyte and oligodendrocyte samples (D) Comparison of contamination indices for groups of samples representing similar cell types. Maximum and minimum values are indicated by yellow or blue shading, respectively. (XLS) [file pone.0016493.s011.xls]

## Sheet: Supplemental Table 2a
Cell Type: Samples	Classification	Method	Contamination Index 1	Contamination Index 2
R_yfp_motor:Y+MCx_1,Y+MCx_2,Y+MCx_3	NON GABA	LCM	0.575052	0.428294
R_yfp_somat:Y+SSCx_1,Y+SSCx_2,Y+SSCx_3	NON GABA	LCM	0.575895	0.450651
I_A9:A9_13_Chee_S1_M430A,A9_14_b_Chee_S2_M430A,A9_14_Chee_S2_M430A,A9_15_Chee_S1_M430A,A9_17_Chee_S1_M430A	NON GABA	LCM	0.4906	0.334706
I_A10:A10_15_Chee_S1_M430A,A10_16_Chee_S1_M430A,A10_17_Chee_S1_M430A,A10_18_Chee_S1_M430A,A10_19_Chee_S1_M430A	NON GABA	LCM	0.357933	0.269984
H_lva_cortex:v2_GSM337817,v2_GSM337818,v2_GSM337819	NON GABA	TRAP	0.700252	0.453529
H_lvb_cortex:v2_GSM337821,v2_GSM337822,v2_GSM337823	NON GABA	TRAP	0.680372	0.414723
H_l6_cortex:v2_GSM337837,v2_GSM337838,v2_GSM337839	NON GABA	TRAP	0.694666	0.464565
H_mn_brainstem:v2_GSM337773,v2_GSM337774,v2_GSM337775	NON GABA	TRAP	0.409066	0.185581
H_chol_basal_fb:v2_GSM337779,v2_GSM337780,v2_GSM337781	NON GABA	TRAP	0.611132	0.485238
H_chol_spinal:v2_GSM337785,v2_GSM337786,v2_GSM337787	NON GABA	TRAP	0.29289	0.170884
H_chol_corp_striatum:v2_GSM337791,v2_GSM337792,v2_GSM337793	NON GABA	TRAP	0.601065	0.482549
H_golgi_cerebellum:v2_GSM337825,v2_GSM337826,v2_GSM337827	NON GABA	TRAP	0.646617	0.261218
H_uni_brush_cerebellum:v2_GSM337828,v2_GSM337829,v2_GSM337830	NON GABA	TRAP	0.271562	0.117923
H_granule_cerebellum:v2_GSM337834,v2_GSM337835,v2_GSM337836	NON GABA	TRAP	0.267773	0.133477
H_molig_cerebellum:v2_GSM337796,v2_GSM337797,v2_GSM337798	NON GABA	TRAP	0.556914	0.192701
H_molig_cortex:v2_GSM337800,v2_GSM337801,v2_GSM337802	NON GABA	TRAP	0.481074	0.328731
H_mixed_olig_cerebellum:v2_GSM337841,v2_GSM337842,v2_GSM337843	NON GABA	TRAP	0.276741	0.119547
H_mixed_olig_cortex:v2_GSM337844,v2_GSM337845,v2_GSM337846	NON GABA	TRAP	0.345611	0.23599
H_bergmann_cerebellum:v2_GSM337861,v2_GSM337862,v2_GSM337863	NON GABA	TRAP	0.276435	0.132008
H_astro_cerebellum:v2_GSM337760,v2_GSM337761,v2_GSM337762	NON GABA	TRAP	0.2444	0.137128
H_astro_cortex:v2_GSM337763,v2_GSM337764,v2_GSM337766,v2_GSM337767	NON GABA	TRAP	0.194532	0.186902
B_astrosP7-8:v2_GSM241898,v2_GSM241900,v2_GSM241902	NON GABA	PAN/FACS	0.116099	0.183118
B_astrosP17:v2_GSM241912,v2_GSM241914,v2_GSM241926	NON GABA	PAN/FACS	0.176011	0.180564
B_astrosP17g:v2_GSM241915,v2_GSM241925	NON GABA	PAN/FACS	0.0816823	0.12751
B_myelinOLs:v2_GSM241890,v2_GSM241893,v2_GSM241894,v2_GSM241918	NON GABA	PAN	0.0757558	0.109409
B_OLs:v2_GSM241889,v2_GSM241891,v2_GSM241892,v2_GSM241917	NON GABA	PAN	0.170105	0.10175
B_OPCs:v2_GSM241895,v2_GSM241916	NON GABA	PAN	0.240685	0.1356
A_callosal_P3:GSM37084,GSM37085	NON GABA	FACS	0.239466	0.292168
A_callosal_P6:GSM37086,GSM37087	NON GABA	FACS	0.151118	0.221571
A_callosal_P14:GSM37088,GSM37089	NON GABA	FACS	0.353025	0.307965
A_corticospinal_P3:GSM37092,GSM37093,GSM37094	NON GABA	FACS	0.132469	0.230525
A_corticospinal_P6:GSM37095,GSM37096	NON GABA	FACS	0.136347	0.200872
A_corticospinal_P14:GSM37097,GSM37098	NON GABA	FACS	0.280344	0.277244
A_corticotecal_P14:GSM37099,GSM37100	NON GABA	FACS	0.221366	0.249049
S_yfp_cg:y105cg,y57cg,y74cg	NON GABA	Manual	0.0843158	0.175954
S_yfp_si:y34si,y50si,y56si	NON GABA	Manual	0.111181	0.171539
S_bcg: b27cg,b36cg,b37cg	NON GABA	Manual	0.0806082	0.173522
S_yfp_a:y111a,y120a,y90a	NON GABA	Manual	0.0915478	0.160949
S_yfp_h:y104h,y43h,y81h	NON GABA	Manual	0.100912	0.168277
S_yrt_wt:v2_yrt2-wt,v2_yrt2-wt1,v2_yrt3-wt,v2_yrt6-wt	NON GABA	Manual	0.0553207	0.11333
S_th_lc:v2_th118LC,v2_th34LC,v2_th52LC	NON GABA	Manual	0.0960526	0.0968546
S_g30_cg:s51cg,s61cg,s64cg	GABA	Manual
S_g30_si:s41si,s54si,s66si	GABA	Manual
S_gin_cg:g32cg,g46cg,g48cg	GABA	Manual
S_gin_h:g29h,g35h,g49h	GABA	Manual
S_g42_cg:h35cg,h43cg,h51cg	GABA	Manual
S_g42_lg:h38blg,h38lg,h48lg_1	GABA	Manual
S_cb_wt:v2_cbw60,v2_cbw73,v2_cbw87,v2_cbw87b	GABA	Manual
R_purkinje:PC400_1,PC400_2,PC400_3	GABA	LCM
H_purkinje_cerebellum:v2_GSM337848,v2_GSM337849,v2_GSM337850,v2_GSM337851,v2_GSM337852,v2_GSM337853	GABA	TRAP
H_cort+_cortex:v2_GSM337804,v2_GSM337805,v2_GSM337806	GABA	TRAP

## Sheet: Supplemental Table 2b
Cell Type: Samples	Classification	Method	Contamination Index 1	Contamination Index 2
R_yfp_motor:Y+MCx_1,Y+MCx_2,Y+MCx_3	NON ASTROCYTE	LCM	0.347292	0.299534
R_yfp_somat:Y+SSCx_1,Y+SSCx_2,Y+SSCx_3	NON ASTROCYTE	LCM	0.328933	0.305007
R_purkinje:PC400_1,PC400_2,PC400_3	NON ASTROCYTE	LCM	0.489595	0.505038
I_A9:A9_13_Chee_S1_M430A,A9_14_b_Chee_S2_M430A,A9_14_Chee_S2_M430A,A9_15_Chee_S1_M430A,A9_17_Chee_S1_M430A	NON ASTROCYTE	LCM	0.290223	0.272239
I_A10:A10_15_Chee_S1_M430A,A10_16_Chee_S1_M430A,A10_17_Chee_S1_M430A,A10_18_Chee_S1_M430A,A10_19_Chee_S1_M430A	NON ASTROCYTE	LCM	0.221653	0.232519
H_lvb_cortex:v2_GSM337821,v2_GSM337822,v2_GSM337823	NON ASTROCYTE	TRAP	0.314955	0.346707
H_l6_cortex:v2_GSM337837,v2_GSM337838,v2_GSM337839	NON ASTROCYTE	TRAP	0.350371	0.334131
H_cck+_cortex:v2_GSM337769,v2_GSM337770,v2_GSM337771	NON ASTROCYTE	TRAP	0.137728	0.148274
H_mn_brainstem:v2_GSM337773,v2_GSM337774,v2_GSM337775	NON ASTROCYTE	TRAP	0.17375	0.222369
H_chol_basal_fb:v2_GSM337779,v2_GSM337780,v2_GSM337781	NON ASTROCYTE	TRAP	0.0756886	0.148495
H_chol_spinal:v2_GSM337785,v2_GSM337786,v2_GSM337787	NON ASTROCYTE	TRAP	0.256687	0.236129
H_chol_corp_striatum:v2_GSM337791,v2_GSM337792,v2_GSM337793	NON ASTROCYTE	TRAP	0.0918592	0.183035
H_cort+_cortex:v2_GSM337804,v2_GSM337805,v2_GSM337806	NON ASTROCYTE	TRAP	0.33981	0.334942
H_drd1+_msn_striatum:v2_GSM337807,v2_GSM337808,v2_GSM337809	NON ASTROCYTE	TRAP	0.152723	0.186857
H_drd2+_msn_striatum:v2_GSM337812,v2_GSM337813,v2_GSM337814	NON ASTROCYTE	TRAP	0.160926	0.192659
H_golgi_cerebellum:v2_GSM337825,v2_GSM337826,v2_GSM337827	NON ASTROCYTE	TRAP	0.134318	0.161011
H_stell_basket_cerebellum:v2_GSM337831,v2_GSM337832,v2_GSM337833	NON ASTROCYTE	TRAP	0.343162	0.38896
H_granule_cerebellum:v2_GSM337834,v2_GSM337835,v2_GSM337836	NON ASTROCYTE	TRAP	0.122846	0.135338
H_molig_cerebellum:v2_GSM337796,v2_GSM337797,v2_GSM337798	NON ASTROCYTE	TRAP	0.326658	0.421889
H_molig_cortex:v2_GSM337800,v2_GSM337801,v2_GSM337802	NON ASTROCYTE	TRAP	0.28735	0.346177
H_mixed_olig_cerebellum:v2_GSM337841,v2_GSM337842,v2_GSM337843	NON ASTROCYTE	TRAP	0.195447	0.27912
H_mixed_olig_cortex:v2_GSM337844,v2_GSM337845,v2_GSM337846	NON ASTROCYTE	TRAP	0.411882	0.476731
H_purkinje_cerebellum:v2_GSM337848,v2_GSM337849,v2_GSM337850,v2_GSM337851,v2_GSM337852,v2_GSM337853	NON ASTROCYTE	TRAP	0.134274	0.144939
H_pnoc+_cortex:v2_GSM337857,v2_GSM337858,v2_GSM337859	NON ASTROCYTE	TRAP	0.158769	0.203642
B_neuronsP7:v2_GSM241899,v2_GSM241901,v2_GSM241903	NON ASTROCYTE	PAN/FACS	0.109981	0.272624
B_neuronsP16:v2_GSM241896,v2_GSM241904	NON ASTROCYTE	PAN/FACS	0.184946	0.337572
B_myelinOLs:v2_GSM241890,v2_GSM241893,v2_GSM241894,v2_GSM241918	NON ASTROCYTE	PAN	0.17677	0.182355
B_OLs:v2_GSM241889,v2_GSM241891,v2_GSM241892,v2_GSM241917	NON ASTROCYTE	PAN	0.117946	0.172297
B_OPCs:v2_GSM241895,v2_GSM241916	NON ASTROCYTE	PAN	0.1657	0.260899
A_callosal_P3:GSM37084,GSM37085	NON ASTROCYTE	FACS	0.158921	0.190391
A_callosal_P6:GSM37086,GSM37087	NON ASTROCYTE	FACS	0.157037	0.175129
A_callosal_P14:GSM37088,GSM37089	NON ASTROCYTE	FACS	0.114139	0.131017
A_corticospinal_P3:GSM37092,GSM37093,GSM37094	NON ASTROCYTE	FACS	0.135999	0.164231
A_corticospinal_P6:GSM37095,GSM37096	NON ASTROCYTE	FACS	0.220725	0.212298
A_corticospinal_P14:GSM37097,GSM37098	NON ASTROCYTE	FACS	0.130466	0.158956
A_corticotecal_P14:GSM37099,GSM37100	NON ASTROCYTE	FACS	0.120808	0.150079
S_yfp_cg:y105cg,y57cg,y74cg	NON ASTROCYTE	Manual	0.100031	0.122457
S_yfp_si:y34si,y50si,y56si	NON ASTROCYTE	Manual	0.109951	0.133182
S_bcg: b27cg,b36cg,b37cg	NON ASTROCYTE	Manual	0.124669	0.128229
S_yfp_a:y111a,y120a,y90a	NON ASTROCYTE	Manual	0.0897338	0.0925764
S_yfp_h:y104h,y43h,y81h	NON ASTROCYTE	Manual	0.0874332	0.115356
S_yrt_wt:v2_yrt2-wt,v2_yrt2-wt1,v2_yrt3-wt,v2_yrt6-wt	NON ASTROCYTE	Manual	0.0985182	0.121174
S_g30_a:s44am,s61am,s63am	NON ASTROCYTE	Manual	0.125684	0.113129
S_g30_cg:s51cg,s61cg,s64cg	NON ASTROCYTE	Manual	0.110328	0.13527
S_g30_si:s41si,s54si,s66si	NON ASTROCYTE	Manual	0.106262	0.133017
S_gin_cg:g32cg,g46cg,g48cg	NON ASTROCYTE	Manual	0.118384	0.131564
S_gin_h:g29h,g35h,g49h	NON ASTROCYTE	Manual	0.114087	0.14714
S_g42_cg:h35cg,h43cg,h51cg	NON ASTROCYTE	Manual	0.101387	0.124513
S_g42_lg:h38blg,h38lg,h48lg_1	NON ASTROCYTE	Manual	0.120577	0.100192
S_g42_p7:v2_H52P7,v2_H65P7,v2_H85P7	NON ASTROCYTE	Manual	0.090216	0.121883
S_g42_p10:v2_H47P10,v2_H71P10,v2_H72P10	NON ASTROCYTE	Manual	0.116516	0.131708
S_g42_p15:v2_H34P13,v2_rhwj1,v2_rhwj2	NON ASTROCYTE	Manual	0.0675127	0.110136
S_g42_p25:v2_H48P25,v2_H53P25,v2_H55P25	NON ASTROCYTE	Manual	0.0951341	0.117378
S_g42_rwt:v2_rhw38,v2_rhw54,v2_rhw60	NON ASTROCYTE	Manual	0.069943	0.0971306
S_cb_wt:v2_cbw60,v2_cbw73,v2_cbw87,v2_cbw87b	NON ASTROCYTE	Manual	0.0707177	0.0882505
S_th_lc:v2_th118LC,v2_th34LC,v2_th52LC	NON ASTROCYTE	Manual	0.0264675	0.0775773
B_astrosP7-8:v2_GSM241898,v2_GSM241900,v2_GSM241902	ASTROCYTE	PAN/FACS
B_astrosP17:v2_GSM241912,v2_GSM241914,v2_GSM241926	ASTROCYTE	PAN/FACS
B_astrosP17g:v2_GSM241915,v2_GSM241925	ASTROCYTE	PAN/FACS
H_astro_cerebellum:v2_GSM337760,v2_GSM337761,v2_GSM337762	ASTROCYTE	TRAP
H_astro_cortex:v2_GSM337763,v2_GSM337764,v2_GSM337766,v2_GSM337767	ASTROCYTE	TRAP

## Sheet: Supplemental Table 2c
Cell Type: Samples	Classification	Method	Contamination Index 1	Contamination Index 2
R_yfp_motor:Y+MCx_1,Y+MCx_2,Y+MCx_3	NON OLIGODENDROCYTE	LCM	0.417682	0.262484
R_yfp_somat:Y+SSCx_1,Y+SSCx_2,Y+SSCx_3	NON OLIGODENDROCYTE	LCM	0.415214	0.262383
R_purkinje:PC400_1,PC400_2,PC400_3	NON OLIGODENDROCYTE	LCM	0.236463	0.230339
I_A9:A9_13_Chee_S1_M430A,A9_14_b_Chee_S2_M430A,A9_14_Chee_S2_M430A,A9_15_Chee_S1_M430A,A9_17_Chee_S1_M430A	NON OLIGODENDROCYTE	LCM	0.468444	0.31845
I_A10:A10_15_Chee_S1_M430A,A10_16_Chee_S1_M430A,A10_17_Chee_S1_M430A,A10_18_Chee_S1_M430A,A10_19_Chee_S1_M430A	NON OLIGODENDROCYTE	LCM	0.431046	0.275397
H_lva_cortex:v2_GSM337817,v2_GSM337818,v2_GSM337819	NON OLIGODENDROCYTE	TRAP	0.588306	0.430687
H_lvb_cortex:v2_GSM337821,v2_GSM337822,v2_GSM337823	NON OLIGODENDROCYTE	TRAP	0.418993	0.31707
H_l6_cortex:v2_GSM337837,v2_GSM337838,v2_GSM337839	NON OLIGODENDROCYTE	TRAP	0.414965	0.2934
H_cck+_cortex:v2_GSM337769,v2_GSM337770,v2_GSM337771	NON OLIGODENDROCYTE	TRAP	0.251825	0.157636
H_mn_brainstem:v2_GSM337773,v2_GSM337774,v2_GSM337775	NON OLIGODENDROCYTE	TRAP	0.352434	0.320064
H_chol_basal_fb:v2_GSM337779,v2_GSM337780,v2_GSM337781	NON OLIGODENDROCYTE	TRAP	0.190064	0.179279
H_chol_spinal:v2_GSM337785,v2_GSM337786,v2_GSM337787	NON OLIGODENDROCYTE	TRAP	0.418061	0.339586
H_chol_corp_striatum:v2_GSM337791,v2_GSM337792,v2_GSM337793	NON OLIGODENDROCYTE	TRAP	0.303245	0.26331
H_cort+_cortex:v2_GSM337804,v2_GSM337805,v2_GSM337806	NON OLIGODENDROCYTE	TRAP	0.463224	0.334697
H_drd1+_msn_striatum:v2_GSM337807,v2_GSM337808,v2_GSM337809	NON OLIGODENDROCYTE	TRAP	0.35475	0.282827
H_drd2+_msn_striatum:v2_GSM337812,v2_GSM337813,v2_GSM337814	NON OLIGODENDROCYTE	TRAP	0.381641	0.317726
H_golgi_cerebellum:v2_GSM337825,v2_GSM337826,v2_GSM337827	NON OLIGODENDROCYTE	TRAP	0.229135	0.164094
H_uni_brush_cerebellum:v2_GSM337828,v2_GSM337829,v2_GSM337830	NON OLIGODENDROCYTE	TRAP	0.245219	0.254548
H_stell_basket_cerebellum:v2_GSM337831,v2_GSM337832,v2_GSM337833	NON OLIGODENDROCYTE	TRAP	0.48199	0.363047
H_granule_cerebellum:v2_GSM337834,v2_GSM337835,v2_GSM337836	NON OLIGODENDROCYTE	TRAP	0.20691	0.176552
H_purkinje_cerebellum:v2_GSM337848,v2_GSM337849,v2_GSM337850,v2_GSM337851,v2_GSM337852,v2_GSM337853	NON OLIGODENDROCYTE	TRAP	0.190745	0.157901
H_pnoc+_cortex:v2_GSM337857,v2_GSM337858,v2_GSM337859	NON OLIGODENDROCYTE	TRAP	0.213845	0.179716
H_bergmann_cerebellum:v2_GSM337861,v2_GSM337862,v2_GSM337863	NON OLIGODENDROCYTE	TRAP	0.5101	0.437076
H_astro_cerebellum:v2_GSM337760,v2_GSM337761,v2_GSM337762	NON OLIGODENDROCYTE	TRAP	0.292334	0.262614
H_astro_cortex:v2_GSM337763,v2_GSM337764,v2_GSM337766,v2_GSM337767	NON OLIGODENDROCYTE	TRAP	0.162643	0.164112
B_astrosP7-8:v2_GSM241898,v2_GSM241900,v2_GSM241902	NON OLIGODENDROCYTE	PAN/FACS	0.1515	0.147962
B_astrosP17:v2_GSM241912,v2_GSM241914,v2_GSM241926	NON OLIGODENDROCYTE	PAN/FACS	0.197258	0.154802
B_astrosP17g:v2_GSM241915,v2_GSM241925	NON OLIGODENDROCYTE	PAN/FACS	0.114933	0.123591
B_neuronsP7:v2_GSM241899,v2_GSM241901,v2_GSM241903	NON OLIGODENDROCYTE	PAN/FACS	0.054757	0.110412
B_neuronsP16:v2_GSM241896,v2_GSM241904	NON OLIGODENDROCYTE	PAN/FACS	0.143217	0.165318
A_callosal_P3:GSM37084,GSM37085	NON OLIGODENDROCYTE	FACS	0.186711	0.111982
A_callosal_P6:GSM37086,GSM37087	NON OLIGODENDROCYTE	FACS	0.194793	0.111661
A_callosal_P14:GSM37088,GSM37089	NON OLIGODENDROCYTE	FACS	0.259983	0.104896
A_corticospinal_P3:GSM37092,GSM37093,GSM37094	NON OLIGODENDROCYTE	FACS	0.175071	0.102393
A_corticospinal_P6:GSM37095,GSM37096	NON OLIGODENDROCYTE	FACS	0.183744	0.10345
A_corticospinal_P14:GSM37097,GSM37098	NON OLIGODENDROCYTE	FACS	0.261467	0.120688
A_corticotecal_P14:GSM37099,GSM37100	NON OLIGODENDROCYTE	FACS	0.243702	0.108234
S_yfp_cg:y105cg,y57cg,y74cg	NON OLIGODENDROCYTE	Manual	0.188612	0.0991742
S_yfp_si:y34si,y50si,y56si	NON OLIGODENDROCYTE	Manual	0.172781	0.0967578
S_bcg: b27cg,b36cg,b37cg	NON OLIGODENDROCYTE	Manual	0.138828	0.096174
S_yfp_a:y111a,y120a,y90a	NON OLIGODENDROCYTE	Manual	0.184909	0.0986471
S_yfp_h:y104h,y43h,y81h	NON OLIGODENDROCYTE	Manual	0.178555	0.103403
S_yrt_wt:v2_yrt2-wt,v2_yrt2-wt1,v2_yrt3-wt,v2_yrt6-wt	NON OLIGODENDROCYTE	Manual	0.302142	0.131714
S_g30_a:s44am,s61am,s63am	NON OLIGODENDROCYTE	Manual	0.171598	0.095692
S_g30_cg:s51cg,s61cg,s64cg	NON OLIGODENDROCYTE	Manual	0.144015	0.0931574
S_g30_si:s41si,s54si,s66si	NON OLIGODENDROCYTE	Manual	0.146491	0.0939507
S_gin_cg:g32cg,g46cg,g48cg	NON OLIGODENDROCYTE	Manual	0.184422	0.0994458
S_gin_h:g29h,g35h,g49h	NON OLIGODENDROCYTE	Manual	0.151751	0.101494
S_g42_cg:h35cg,h43cg,h51cg	NON OLIGODENDROCYTE	Manual	0.141534	0.0894077
S_g42_lg:h38blg,h38lg,h48lg_1	NON OLIGODENDROCYTE	Manual	0.165724	0.104247
S_g42_p7:v2_H52P7,v2_H65P7,v2_H85P7	NON OLIGODENDROCYTE	Manual	0.176718	0.0972256
S_g42_p10:v2_H47P10,v2_H71P10,v2_H72P10	NON OLIGODENDROCYTE	Manual	0.198039	0.0864819
S_g42_p15:v2_H34P13,v2_rhwj1,v2_rhwj2	NON OLIGODENDROCYTE	Manual	0.189432	0.0768742
S_g42_p25:v2_H48P25,v2_H53P25,v2_H55P25	NON OLIGODENDROCYTE	Manual	0.230309	0.105851
S_g42_rwt:v2_rhw38,v2_rhw54,v2_rhw60	NON OLIGODENDROCYTE	Manual	0.149642	0.0871011
S_cb_wt:v2_cbw60,v2_cbw73,v2_cbw87,v2_cbw87b	NON OLIGODENDROCYTE	Manual	0.127612	0.0998927
S_th_lc:v2_th118LC,v2_th34LC,v2_th52LC	NON OLIGODENDROCYTE	Manual	0.0888569	0.1104
B_myelinOLs:v2_GSM241890,v2_GSM241893,v2_GSM241894,v2_GSM241918	OLIGODENDROCYTE	PAN
B_OLs:v2_GSM241889,v2_GSM241891,v2_GSM241892,v2_GSM241917	OLIGODENDROCYTE	PAN
H_molig_cerebellum:v2_GSM337796,v2_GSM337797,v2_GSM337798	OLIGODENDROCYTE	TRAP
H_molig_cortex:v2_GSM337800,v2_GSM337801,v2_GSM337802	OLIGODENDROCYTE	TRAP
H_mixed_olig_cerebellum:v2_GSM337841,v2_GSM337842,v2_GSM337843	OLIGODENDROCYTE	TRAP
H_mixed_olig_cortex:v2_GSM337844,v2_GSM337845,v2_GSM337846	OLIGODENDROCYTE	TRAP

## Sheet: Supplemental Table 2d
Cortical pyramidal neurons (mature animals only)	Method	GABA index 1	GABA index 2	Astrocyte index 1	Astrocyte index 2	Oligodendrocyte index 1	Oligodendrocyte index 2
R_yfp_motor:Y+MCx_1,Y+MCx_2,Y+MCx_3	LCM	0.575052	0.428294	0.347292	0.299534	0.417682	0.262484
R_yfp_somat:Y+SSCx_1,Y+SSCx_2,Y+SSCx_3	LCM	0.575895	0.450651	0.328933	0.305007	0.415214	0.262383
H_lva_cortex:v2_GSM337817,v2_GSM337818,v2_GSM337819	TRAP	0.700252	0.453529	N/A	N/A	0.588306	0.430687
H_lvb_cortex:v2_GSM337821,v2_GSM337822,v2_GSM337823	TRAP	0.680372	0.414723	0.314955	0.346707	0.418993	0.31707
H_l6_cortex:v2_GSM337837,v2_GSM337838,v2_GSM337839	TRAP	0.694666	0.464565	0.350371	0.334131	0.414965	0.2934
S_yfp_cg:y105cg,y57cg,y74cg	Manual	0.0843158	0.175954	0.100031	0.122457	0.188612	0.0991742
S_yfp_si:y34si,y50si,y56si	Manual	0.111181	0.171539	0.109951	0.133182	0.172781	0.0967578
S_bcg: b27cg,b36cg,b37cg	Manual	0.0806082	0.173522	0.124669	0.128229	0.138828	0.096174
S_yrt_wt:v2_yrt2-wt,v2_yrt2-wt1,v2_yrt3-wt,v2_yrt6-wt	Manual	0.0553207	0.11333	0.0985182	0.121174	0.302142	0.131714
Cerebellar Purkinje Neurons
R_purkinje:PC400_1,PC400_2,PC400_3	LCM	N/A	N/A	0.489595	0.505038	0.236463	0.230339
H_purkinje_cerebellum:v2_GSM337848,v2_GSM337849,v2_GSM337850,v2_GSM337851,v2_GSM337852,v2_GSM337853	TRAP	N/A	N/A	0.134274	0.144939	0.190745	0.157901
S_cb_wt:v2_cbw60,v2_cbw73,v2_cbw87,v2_cbw87b	Manual	N/A	N/A	0.0707177	0.0882505	0.127612	0.0998927
Cortical Astrocytes
H_astro_cortex:v2_GSM337763,v2_GSM337764,v2_GSM337766,v2_GSM337767	TRAP	0.194532	0.186902	N/A	N/A	0.162643	0.164112
B_astrosP17:v2_GSM241912,v2_GSM241914,v2_GSM241926	PAN/FACS	0.176011	0.180564	N/A	N/A	0.197258	0.154802
B_astrosP17g:v2_GSM241915,v2_GSM241925	PAN/FACS	0.0816823	0.12751	N/A	N/A	0.114933	0.123591
Cortical Oligodendrocytes
H_molig_cortex:v2_GSM337800,v2_GSM337801,v2_GSM337802	TRAP	0.481074	0.328731	0.28735	0.346177	N/A	N/A
B_myelinOLs:v2_GSM241890,v2_GSM241893,v2_GSM241894,v2_GSM241918	PAN	0.0757558	0.109409	0.17677	0.182355	N/A	N/A
Cortical GABAergic Interneurons (mature animals only)
H_cort+_cortex:v2_GSM337804,v2_GSM337805,v2_GSM337806	TRAP	N/A	N/A	0.33981	0.334942	0.463224	0.334697
S_g30_cg:s51cg,s61cg,s64cg	Manual	N/A	N/A	0.110328	0.13527	0.144015	0.0931574
S_g30_si:s41si,s54si,s66si	Manual	N/A	N/A	0.106262	0.133017	0.146491	0.0939507
S_gin_cg:g32cg,g46cg,g48cg	Manual	N/A	N/A	0.118384	0.131564	0.184422	0.0994458
S_g42_cg:h35cg,h43cg,h51cg	Manual	N/A	N/A	0.101387	0.124513	0.141534	0.0894077
S_g42_rwt:v2_rhw38,v2_rhw54,v2_rhw60	Manual	N/A	N/A	0.069943	0.0971306	0.149642	0.0871011
note: maximum value for a given index denoted by yellow shading,
while the minimum value is indicated by blue shading.
