# Supplementary material for: A Quantitative Comparison of Cell-Type-Specific Microarray Gene Expression Profiling Methods in the Mouse Brain
Source: PLoS One. 2011 Jan 27;6(1):e16493. doi: 10.1371/journal.pone.0016493 (PMC3029380; doi:10.1371/journal.pone.0016493)
Supplement: Table S4 — Suspected non-Purkinje contamination genes. Links to Allen Brain Atlas in situ hybridization data and PubMed identifiers of references indicating non-Purkinje expression of the corresponding gene. (XLS) [file pone.0016493.s013.xls]

## Sheet: Sheet1
Suspected contamination gene	Allen Brain Atlas ISH Evidence	Other Evidence (PubMed IDs)	Presumed Source
Cryab	http://mouse.brain-map.org/brain/Cryab/72182998/thumbnails.html?ispopup=1	19129171	astrocyte
Gjb6	http://mouse.brain-map.org/brain/Gjb6/2262/thumbnails.html?ispopup=1	18480277	astrocyte
Fgfr3	http://mouse.brain-map.org/brain/Fgfr3/449/thumbnails.html?ispopup=1	12574417	oligodendrocyte
Sdc4	http://mouse.brain-map.org/brain/Sdc4/633291/thumbnails.html?ispopup=1	12210841;10460248	glia
Tnc	http://mouse.brain-map.org/brain/Tnc/69817007/thumbnails.html?ispopup=1	19508743	astrocyte
Slc14a1	http://mouse.brain-map.org/brain/Slc14a1/76003324/thumbnails.html?ispopup=1	18171944	astrocyte
Cnp	http://mouse.brain-map.org/brain/Cnp1/1176/thumbnails.html?ispopup=1	19187445	oligodendrocyte
Lrig1	http://mouse.brain-map.org/brain/Lrig1/1372/thumbnails.html?ispopup=1	8798419	bergmann glia
Mlc1	http://mouse.brain-map.org/brain/Mlc1/1771/thumbnails.html?ispopup=1	17434314	astrocytes and neurons, barres astro
S100b	http://mouse.brain-map.org/brain/S100b/924/thumbnails.html?ispopup=1	17078026	astrocyte
Mbp	http://mouse.brain-map.org/brain/Mbp/1226/thumbnails.html?ispopup=1	18171944	oligodendrocyte
Serpine2	http://mouse.brain-map.org/brain/Serpine2/70429429/thumbnails.html?ispopup=1	17942730;7608203;8151733	glia and non-Purkinje neurons
Kcnj10	http://mouse.brain-map.org/brain/Kcnj10/69735700/thumbnails.html?ispopup=1	16925593	glia
Fabp7	http://mouse.brain-map.org/brain/Fabp7/68844373/thumbnails.html?ispopup=1	15879553	glia
Gabra6	http://mouse.brain-map.org/brain/Gabra6/69256866/thumbnails.html?ispopup=1	17134990	granule cells
Mt1	http://mouse.brain-map.org/brain/Mt1/67767450/thumbnails.html?ispopup=1	18501512;9926848	granule cells
Sox2	http://mouse.brain-map.org/brain/Sox2/79677365/thumbnails.html?ispopup=1	19418461;19061938	bergmann glia, neural stem cells, interneurons
Apoe	http://mouse.brain-map.org/brain/Apoe/77620395/thumbnails.html?ispopup=1	16687490	astrocyte
Vim	http://mouse.brain-map.org/brain/Vim/79677375/thumbnails.html?ispopup=1	19593677	bergmann glia
Zic1	http://mouse.brain-map.org/brain/Zic1/79677351/thumbnails.html?ispopup=1	16406324;17360405	granule cell
Gja1	http://mouse.brain-map.org/brain/Gja1/2256/thumbnails.html?ispopup=1	18171944	astrocyte
Slc1a3	http://mouse.brain-map.org/brain/Slc1a3/77620233/thumbnails.html?ispopup=1	12878755	glia
Gpm6b	http://mouse.brain-map.org/brain/Gpm6b/74357593/thumbnails.html?ispopup=1	8661015	glia
