# Supplementary material for: A Quantitative Comparison of Cell-Type-Specific Microarray Gene Expression Profiling Methods in the Mouse Brain
Source: PLoS One. 2011 Jan 27;6(1):e16493. doi: 10.1371/journal.pone.0016493 (PMC3029380; doi:10.1371/journal.pone.0016493)
Supplement: Table S6 — GO overrepresentation analysis for Purkinje Cells. (A) LCM enriched and depleted, (B) TRAP enriched and depleted, (C) Manual enriched and depleted. (XLS) [file pone.0016493.s015.xls]

## Sheet: Supplemental Table 6a
LCM PURKINJE ENRICHED
Biological Process
GO id	node	total	p-value	tree	total	p-value	name
GO:0006605	4	67	0.0207	12	169	1.32e-05	protein targeting
GO:0051649	0	2	1	25	693	7.27e-05	establishment of cellular localization
GO:0051641	0	0	1	25	710	0.000107	cellular localization
GO:0046907	0	8	1	22	591	0.000132	intracellular transport
GO:0006886	8	206	0.0157	16	380	0.000301	intracellular protein transport
GO:0008104	2	43	0.1455	21	663	0.00156	protein localization
GO:0015031	12	418	0.0313	19	599	0.00259	protein transport
GO:0033036	0	0	1	21	693	0.00267	macromolecule localization
GO:0045184	0	1	1	19	611	0.00322	establishment of protein localization
GO:0051179	0	0	1	51	2367	0.00709	localization
GO:0016192	7	148	0.0086	13	383	0.00714	vesicle-mediated transport
GO:0051056	2	37	0.1139	7	147	0.00831	regulation of small GTPase mediated signal transduction
GO:0051234	0	0	1	46	2112	0.00917	establishment of localization
GO:0006810	30	1404	0.0457	45	2065	0.00996	transport
Molecular Function
GO id	node	total	p-value	tree	total	p-value	name
GO:0003723	21	546	0.0002	22	583	0.000138	RNA binding
GO:0000166	41	1433	0.0001	45	1719	0.000354	nucleotide binding
GO:0005488	21	658	0.0017	159	9106	0.00275	binding
GO:0015631	1	7	0.106	5	61	0.00276	tubulin binding
GO:0008565	7	114	0.0022	7	128	0.00427	protein transporter activity
Cellular Component
GO id	node	total	p-value	tree	total	p-value	name
GO:0043005	1	27	0.3385	10	129	2.58e-05	neuron projection
GO:0031410	6	135	0.0168	17	376	5.66e-05	cytoplasmic vesicle
GO:0031982	0	3	1	17	385	7.58e-05	vesicle
GO:0030425	5	44	0.0005	6	50	0.000102	dendrite
GO:0016023	1	42	0.4744	14	310	0.000265	cytoplasmic membrane-bounded vesicle
GO:0031988	0	0	1	14	318	0.000343	membrane-bounded vesicle
GO:0044433	0	1	1	7	90	0.000425	cytoplasmic vesicle part
GO:0009986	5	85	0.0094	11	223	0.000587	cell surface
GO:0030054	11	262	0.0022	14	337	0.000612	cell junction
GO:0012506	0	11	1	7	98	0.00071	vesicle membrane
GO:0045202	7	175	0.0173	10	205	0.00113	synapse
GO:0030135	0	0	1	7	107	0.0012	coated vesicle
GO:0030659	2	40	0.1229	6	80	0.00133	cytoplasmic vesicle membrane
GO:0016020	77	4118	0.0133	93	4838	0.00159	membrane
GO:0000139	10	226	0.0023	11	256	0.0018	Golgi membrane
GO:0012505	0	9	1	23	791	0.00192	endomembrane system
GO:0005886	28	1235	0.0193	46	2024	0.00228	plasma membrane
GO:0044425	0	0	1	78	3969	0.00304	membrane part
GO:0044459	0	0	1	29	1129	0.00321	plasma membrane part
GO:0005911	1	18	0.2407	7	133	0.00411	intercellular junction
GO:0044431	0	0	1	11	306	0.00695	Golgi apparatus part
GO:0031090	0	1	1	29	1194	0.00706	organelle membrane
LCM PURKINJE DEPLETED
Biological Process
GO id	node	total	p-value	tree	total	p-value	name
GO:0044237	0	15	1	116	5201	0.00278	cellular metabolic process
GO:0008152	8	646	0.9186	125	5719	0.00334	metabolic process
GO:0043412	0	0	1	39	1368	0.00369	biopolymer modification
GO:0044238	0	0	1	114	5132	0.00384	primary metabolic process
GO:0051188	0	0	1	5	62	0.00574	cofactor biosynthetic process
GO:0006464	3	121	0.3901	37	1327	0.0068	protein modification process
GO:0007611	1	20	0.3126	5	68	0.00845	learning and/or memory
Molecular Function
GO id	node	total	p-value	tree	total	p-value	name
GO:0004674	15	334	0.0015	15	344	0.00203	protein serine/threonine kinase activity
GO:0008134	6	98	0.0101	11	253	0.00801	transcription factor binding
Cellular Component
GO id	node	total	p-value	tree	total	p-value	name
GO:0005622	38	1387	0.006	179	7923	6.29e-09	intracellular
GO:0044424	0	0	1	170	7617	4.76e-07	intracellular part
GO:0043226	0	0	1	146	6415	1.43e-05	organelle
GO:0043229	0	0	1	145	6410	2.58e-05	intracellular organelle
GO:0005623	0	1	1	203	10414	2.63e-05	cell
GO:0044464	0	0	1	203	10414	2.63e-05	cell part
GO:0043227	0	0	1	131	5657	4.44e-05	membrane-bounded organelle
GO:0043231	1	3	0.0535	130	5652	7.56e-05	intracellular membrane-bounded organelle
GO:0005737	69	2835	0.0036	118	5140	0.00034	cytoplasm
GO:0005634	80	3399	0.0038	84	3485	0.00131	nucleus
GO:0044455	0	0	1	5	61	0.00492	mitochondrial membrane part

## Sheet: Supplemental Table 6b
TRAP PURKINJE ENRICHED
Biological Process
GO id	node	total	p-value	tree	total	p-value	name
GO:0006139	0	32	1	28	2117	0.00868	nucleobase, nucleoside, nucleotide and nucleic acid metabolic process
Molecular Function
GO id	node	total	p-value	tree	total	p-value	name
Cellular Component
GO id	node	total	p-value	tree	total	p-value	name
GO:0031974	0	0	1	15	999	0.00384	membrane-enclosed lumen
GO:0043233	0	0	1	15	999	0.00384	organelle lumen
TRAP PURKINJE DEPLETED
Biological Process
GO id	node	total	p-value	tree	total	p-value	name
GO:0051179	0	0	1	87	2367	3.31e-07	localization
GO:0051234	0	0	1	78	2112	1.62e-06	establishment of localization
GO:0006810	56	1404	0	76	2065	2.74e-06	transport
GO:0016192	8	148	0.0185	24	383	5.32e-06	vesicle-mediated transport
GO:0051641	0	0	1	35	710	8.45e-06	cellular localization
GO:0050885	6	21	0	6	23	8.89e-06	neuromuscular process controlling balance
GO:0051649	0	2	1	34	693	1.28e-05	establishment of cellular localization
GO:0016043	1	12	0.239	69	2010	0.000102	cellular component organization and biogenesisOver
GO:0050905	1	8	0.1664	6	36	0.000134	neuromuscular process
GO:0043170	0	0	1	102	3392	0.000247	macromolecule metabolic process
GO:0006816	9	93	0.0002	9	94	0.000255	calcium ion transport
GO:0009408	5	27	0.0003	5	27	0.000297	response to heat
GO:0006512	19	353	0.0004	20	378	0.000336	ubiquitin cycle
GO:0046907	1	8	0.1664	27	591	0.000344	intracellular transport
GO:0006886	9	206	0.0431	20	380	0.00036	intracellular protein transport
GO:0043283	0	0	1	72	2229	0.000461	biopolymer metabolic process
GO:0007017	4	65	0.0582	12	175	0.000584	microtubule-based process
GO:0016070	5	13	0	24	524	0.000718	RNA metabolic process
GO:0051239	0	0	1	13	205	0.000731	regulation of multicellular organismal processOver
GO:0051128	0	0	1	14	234	0.000818	regulation of cellular component organization and biogenesis
GO:0008104	3	43	0.0718	28	663	0.000925	protein localization
GO:0055080	0	0	1	10	137	0.00103	cation homeostasis
GO:0051129	0	0	1	7	74	0.00133	negative regulation of cellular component organization and biogenesis
GO:0050808	2	11	0.0242	5	37	0.00134	synapse organization and biogenesis
GO:0006464	5	121	0.1369	46	1327	0.00164	protein modification process
GO:0043412	0	0	1	47	1368	0.00175	biopolymer modification
GO:0033036	0	0	1	28	693	0.0018	macromolecule localization
GO:0030003	0	0	1	9	124	0.0019	cellular cation homeostasis
GO:0019538	1	24	0.421	76	2503	0.00194	protein metabolic process
GO:0015674	0	0	1	9	126	0.00212	di-, tri-valent inorganic cation transport
GO:0006897	4	98	0.1789	10	151	0.00215	endocytosis
GO:0010324	0	0	1	10	151	0.00215	membrane invagination
GO:0009266	0	4	1	5	42	0.00238	response to temperature stimulus
GO:0031644	0	0	1	6	62	0.00261	regulation of neurological system process
GO:0044260	0	0	1	74	2449	0.00263	cellular macromolecule metabolic process
GO:0045184	1	1	0.0225	25	611	0.00268	establishment of protein localization
GO:0031326	0	0	1	8	108	0.00296	regulation of cellular biosynthetic process
GO:0030005	0	0	1	8	110	0.00332	cellular di-, tri-valent inorganic cation homeostasis
GO:0006457	9	116	0.0012	9	135	0.00339	protein folding
GO:0006986	5	34	0.0009	5	46	0.00356	response to unfolded protein
GO:0008016	0	25	1	5	46	0.00356	regulation of heart contraction
GO:0051789	0	0	1	5	46	0.00356	response to protein stimulus
GO:0032940	0	0	1	10	162	0.00358	secretion by cell
GO:0055066	0	0	1	8	114	0.00413	di-, tri-valent inorganic cation homeostasis
GO:0015031	12	418	0.232	24	599	0.00424	protein transport
GO:0016071	1	24	0.421	13	254	0.00487	mRNA metabolic process
GO:0006397	11	218	0.0103	12	227	0.00522	mRNA processing
GO:0044267	1	18	0.3362	71	2395	0.00545	cellular protein metabolic process
GO:0050804	1	9	0.1852	5	51	0.00558	regulation of synaptic transmission
GO:0043687	1	53	0.7014	39	1156	0.00614	post-translational protein modification
GO:0006643	0	0	1	9	148	0.00618	membrane lipid metabolic process
GO:0006874	4	43	0.0155	6	74	0.00629	cellular calcium ion homeostasis
GO:0040007	0	23	1	7	98	0.0065	growth
GO:0051969	0	0	1	5	53	0.00657	regulation of transmission of nerve impulse
GO:0046467	0	0	1	6	76	0.00715	membrane lipid biosynthetic process
GO:0030001	0	17	1	15	328	0.00722	metal ion transport
GO:0055074	0	4	1	6	77	0.00761	calcium ion homeostasis
GO:0045045	0	6	1	8	127	0.00786	secretory pathway
GO:0006461	5	58	0.0096	9	154	0.00796	protein complex assembly
GO:0006606	4	22	0.0013	5	56	0.00829	protein import into nucleus
GO:0006812	6	71	0.0051	17	401	0.00907	cation transport
GO:0006814	6	81	0.0097	6	81	0.00968	sodium ion transport
GO:0006875	0	3	1	6	81	0.00968	cellular metal ion homeostasis
GO:0007156	6	81	0.0097	6	81	0.00968	homophilic cell adhesion
Molecular Function
GO id	node	total	p-value	tree	total	p-value	name
GO:0005515	143	4177	0	162	5181	1.18e-08	protein binding
GO:0005215	15	302	0.0037	46	1072	1.55e-05	transporter activity
GO:0005509	33	696	0	33	696	4.33e-05	calcium ion binding
GO:0022892	0	0	1	36	805	6.43e-05	substrate-specific transporter activity
GO:0005524	46	1136	0.0001	46	1136	6.58e-05	ATP binding
GO:0032559	0	0	1	46	1149	8.65e-05	adenyl ribonucleotide binding
GO:0030554	0	0	1	47	1210	0.000148	adenyl nucleotide binding
GO:0016887	7	104	0.0093	17	275	0.000174	ATPase activity
GO:0015075	0	11	1	27	570	0.000228	ion transmembrane transporter activity
GO:0016874	13	213	0.0011	17	299	0.000464	ligase activity
GO:0022891	0	0	1	28	630	0.00049	substrate-specific transmembrane transporter activity
GO:0005488	36	658	0	225	9106	0.0013	binding
GO:0008066	0	0	1	5	38	0.00157	glutamate receptor activity
GO:0022857	2	44	0.2632	29	722	0.00189	transmembrane transporter activity
GO:0042623	2	5	0.0049	13	227	0.002	ATPase activity, coupled
GO:0008324	0	15	1	20	434	0.00208	cation transmembrane transporter activity
GO:0004842	8	104	0.0025	8	104	0.00247	ubiquitin-protein ligase activity
GO:0000166	44	1433	0.0213	56	1719	0.00264	nucleotide binding
GO:0008017	5	42	0.0025	5	46	0.00369	microtubule binding
GO:0019904	1	24	0.4235	7	92	0.00483	protein domain specific binding
GO:0051082	6	72	0.0057	6	72	0.00573	unfolded protein binding
GO:0015276	0	0	1	6	74	0.00654	ligand-gated ion channel activity
GO:0022834	0	0	1	6	74	0.00654	ligand-gated channel activity
GO:0032553	0	0	1	46	1425	0.00792	ribonucleotide binding
GO:0032555	0	0	1	46	1425	0.00792	purine ribonucleotide binding
GO:0019787	1	54	0.7109	8	128	0.00863	small conjugating protein ligase activity
GO:0005262	5	57	0.0092	5	57	0.00923	calcium channel activity
GO:0005516	7	104	0.0093	7	104	0.00932	calmodulin binding
Cellular Component
GO id	node	total	p-value	tree	total	p-value	name
GO:0016023	2	42	0.2449	30	310	1.42e-11	cytoplasmic membrane-bounded vesicle
GO:0031410	11	135	0.0002	33	376	1.81e-11	cytoplasmic vesicle
GO:0031988	0	0	1	30	318	2.69e-11	membrane-bounded vesicle
GO:0031982	0	3	1	33	385	3.42e-11	vesicle
GO:0042470	15	91	0	15	94	2.54e-09	melanosome
GO:0048770	0	0	1	15	94	2.54e-09	pigment granule
GO:0012505	0	9	1	43	791	5.47e-08	endomembrane system
GO:0044425	0	0	1	127	3969	8.59e-07	membrane part
GO:0045202	15	175	0	18	205	8.74e-07	synapse
GO:0044432	0	0	1	27	432	1.59e-06	endoplasmic reticulum part
GO:0044444	0	2	1	105	3140	2.33e-06	cytoplasmic part
GO:0005783	33	635	0	35	677	3.5e-06	endoplasmic reticulum
GO:0031224	0	21	1	110	3399	5.76e-06	intrinsic to membrane
GO:0016021	105	3283	0	109	3387	8.74e-06	integral to membrane
GO:0030135	0	0	1	11	107	2.87e-05	coated vesicle
GO:0005737	72	2835	0.1376	146	5140	9.58e-05	cytoplasm
GO:0031090	0	1	1	47	1194	9.81e-05	organelle membrane
GO:0030136	0	5	1	9	92	0.000225	clathrin-coated vesicle
GO:0005789	20	347	0.0001	20	378	0.000363	endoplasmic reticulum membrane
GO:0042175	0	2	1	20	382	0.000415	nuclear envelope-endoplasmic reticulum networkOver
GO:0044459	0	0	1	43	1129	0.000416	plasma membrane part
GO:0030054	16	262	0.0003	18	337	0.000638	cell junction
GO:0044433	0	1	1	8	90	0.00095	cytoplasmic vesicle part
GO:0045211	8	90	0.001	8	90	0.00095	postsynaptic membrane
GO:0005788	5	49	0.0048	6	51	0.00096	endoplasmic reticulum lumen
GO:0016020	118	4118	0.0007	134	4838	0.00102	membrane
GO:0043231	0	3	1	152	5652	0.00123	intracellular membrane-bounded organelle
GO:0005635	6	45	0.0005	10	140	0.00127	nuclear envelope
GO:0043227	0	0	1	152	5657	0.00129	membrane-bounded organelle
GO:0012506	0	11	1	8	98	0.00165	vesicle membrane
GO:0005798	0	5	1	5	39	0.00173	Golgi-associated vesicle
GO:0044422	0	0	1	90	3036	0.00175	organelle part
GO:0044456	0	0	1	8	101	0.002	synapse part
GO:0005623	0	1	1	247	10414	0.00202	cell
GO:0044464	0	0	1	247	10414	0.00202	cell part
GO:0005886	35	1235	0.0926	64	2024	0.00233	plasma membrane
GO:0005624	11	228	0.0145	20	440	0.00233	membrane fraction
GO:0044446	0	0	1	89	3024	0.00237	intracellular organelle part
GO:0008021	5	57	0.0091	6	61	0.00245	synaptic vesicle
GO:0043229	0	0	1	167	6410	0.00255	intracellular organelle
GO:0043005	3	27	0.0223	9	129	0.00258	neuron projection
GO:0043226	0	0	1	167	6415	0.00267	organelle
GO:0044431	0	0	1	15	306	0.00404	Golgi apparatus part
GO:0000139	12	226	0.0052	13	256	0.00542	Golgi membrane
GO:0005794	20	497	0.0089	22	541	0.0055	Golgi apparatus
GO:0000267	0	0	1	21	513	0.00616	cell fraction
GO:0031965	2	28	0.131	7	99	0.00704	nuclear membrane
GO:0030117	5	33	0.0008	5	54	0.00725	membrane coat
GO:0048475	0	0	1	5	54	0.00725	coated membrane
GO:0005643	5	55	0.0078	5	55	0.00783	nuclear pore
GO:0030659	4	40	0.0123	6	80	0.00933	cytoplasmic vesicle membrane

## Sheet: Supplemental Table 6c
MANUAL PURKINJE ENRICHED
Biological Process
GO id	node	total	p-value	tree	total	p-value	name
GO:0006811	20	430	0	26	615	3.53e-06	ion transport
GO:0006812	7	71	0.0001	18	401	5.96e-05	cation transport
GO:0030001	0	17	1	15	328	0.000206	metal ion transport
GO:0006816	7	93	0.0006	7	94	0.000689	calcium ion transport
GO:0031324	0	0	1	15	381	0.000993	negative regulation of cellular metabolic process
GO:0009892	0	0	1	15	388	0.00119	negative regulation of metabolic process
GO:0006418	3	45	0.0337	5	51	0.0012	tRNA aminoacylation for protein translation
GO:0043038	0	0	1	5	51	0.0012	amino acid activation
GO:0043039	1	5	0.0764	5	51	0.0012	tRNA aminoacylation
GO:0051179	0	0	1	54	2367	0.0017	localization
GO:0007399	5	185	0.1678	19	600	0.00282	nervous system development
GO:0006813	7	123	0.0033	7	123	0.00327	potassium ion transport
GO:0051234	0	0	1	48	2112	0.00371	establishment of localization
GO:0015674	0	0	1	7	126	0.00374	di-, tri-valent inorganic cation transport
GO:0006810	37	1404	0.001	47	2065	0.00403	transport
GO:0015672	0	7	1	10	239	0.00454	monovalent inorganic cation transport
GO:0051129	0	0	1	5	74	0.00615	negative regulation of cellular component organization and biogenesis
Molecular Function
GO id	node	total	p-value	tree	total	p-value	name
GO:0022836	0	0	1	12	225	0.000246	gated channel activity
GO:0008066	0	0	1	5	38	0.000313	glutamate receptor activity
GO:0022857	1	44	0.5061	24	722	0.000451	transmembrane transporter activity
GO:0015075	0	11	1	20	570	0.000713	ion transmembrane transporter activity
GO:0005215	5	302	0.5257	31	1072	0.000719	transporter activity
GO:0022892	0	0	1	25	805	0.000921	substrate-specific transporter activity
GO:0022891	0	0	1	21	630	0.00101	substrate-specific transmembrane transporter activity
GO:0022843	0	0	1	7	100	0.00105	voltage-gated cation channel activity
GO:0015276	0	0	1	6	74	0.00112	ligand-gated ion channel activity
GO:0022834	0	0	1	6	74	0.00112	ligand-gated channel activity
GO:0004812	4	50	0.008	5	52	0.00135	aminoacyl-tRNA ligase activity
GO:0016875	0	0	1	5	52	0.00135	ligase activity, forming carbon-oxygen bonds
GO:0016876	1	5	0.0769	5	52	0.00135	ligase activity, forming aminoacyl-tRNA and related compounds
GO:0005216	12	247	0.0006	12	274	0.00141	ion channel activity
GO:0022838	0	0	1	12	284	0.00191	substrate specific channel activity
GO:0005262	5	57	0.002	5	57	0.00205	calcium channel activity
GO:0005230	1	36	0.4384	5	58	0.00221	extracellular ligand-gated ion channel activitOver
GO:0005515	92	4177	0.0001	101	5181	0.00299	protein binding
GO:0015267	0	1	1	12	302	0.00316	channel activity
GO:0022803	0	0	1	12	302	0.00316	passive transmembrane transporter activity
GO:0005509	21	696	0.0034	21	696	0.00339	calcium ion binding
GO:0008134	4	98	0.0704	10	253	0.00711	transcription factor binding
GO:0005244	6	114	0.0096	7	141	0.00719	voltage-gated ion channel activity
GO:0022832	0	0	1	7	141	0.00719	voltage-gated channel activity
GO:0003713	4	65	0.0196	5	79	0.00834	transcription coactivator activity
Cellular Component
GO id	node	total	p-value	tree	total	p-value	name
GO:0031224	0	21	1	94	3399	1.49e-08	intrinsic to membrane
GO:0016021	91	3283	0	93	3387	2.86e-08	integral to membrane
GO:0044425	0	0	1	101	3969	2.57e-07	membrane part
GO:0016020	106	4118	0	113	4838	2.77e-06	membrane
GO:0045202	12	175	0	13	205	4.27e-05	synapse
GO:0000267	0	0	1	21	513	0.000148	cell fraction
GO:0005624	13	228	0.0001	19	440	0.000157	membrane fraction
GO:0045211	7	90	0.0008	7	90	0.000793	postsynaptic membrane
GO:0019717	5	46	0.001	5	46	0.00101	synaptosome
GO:0005886	32	1235	0.0087	51	2024	0.00142	plasma membrane
GO:0044456	0	0	1	7	101	0.00156	synapse part
GO:0030054	12	262	0.0016	14	337	0.00169	cell junction
GO:0044459	0	0	1	32	1129	0.00225	plasma membrane part
GO:0044432	0	0	1	15	432	0.00636	endoplasmic reticulum part
GO:0012505	0	9	1	23	791	0.00717	endomembrane system
GO:0005623	0	1	1	184	10414	0.00992	cell
GO:0044464	0	0	1	184	10414	0.00992	cell part
MANUAL PURKINJE DEPLETED
Biological Process
GO id	node	total	p-value	tree	total	p-value	name
GO:0006886	3	206	0.0249	6	380	0.000923	intracellular protein transport
GO:0015031	4	418	0.038	7	599	0.00193	protein transport
GO:0045184	0	1	1	7	611	0.00216	establishment of protein localization
GO:0008104	0	43	1	7	663	0.00342	protein localization
GO:0033036	0	0	1	7	693	0.00438	macromolecule localization
GO:0051649	0	2	1	7	693	0.00438	establishment of cellular localization
GO:0051641	0	0	1	7	710	0.005	cellular localization
GO:0016192	2	148	0.0755	5	383	0.00584	vesicle-mediated transport
GO:0046907	0	8	1	6	591	0.00836	intracellular transport
Molecular Function
GO id	node	total	p-value	tree	total	p-value	name
Cellular Component
GO id	node	total	p-value	tree	total	p-value	name
GO:0005737	13	2835	0.0215	21	5140	0.00552	cytoplasm
GO:0044459	0	0	1	8	1129	0.00751	plasma membrane part
